# Supplementary material
Source: PubMed Central journal article supplement (PMC5148701)

## SUPPORTING INFORMATION

### Discovery of G Protein-biased D2 Dopamine Receptor Partial Agonists

*Xin Chen,<sup>†,#</sup> John D. McCorvy,<sup>§,#</sup> Matthew G. Fischer,<sup>†</sup> Kyle V. Butler,<sup>†</sup> Yudao Shen,<sup>†</sup> Bryan L. Roth,<sup>§,\*</sup> and Jian Jin<sup>†,\*</sup>*

#### Table of Contents

|                                                                                                              |     |
|--------------------------------------------------------------------------------------------------------------|-----|
| A. <sup>1</sup> H NMR spectrum of compound <b>1</b>                                                          | S2  |
| B. <sup>13</sup> C NMR spectrum of compound <b>1</b>                                                         | S3  |
| C. <sup>1</sup> H NMR spectrum of compound <b>24</b>                                                         | S4  |
| D. <sup>13</sup> C NMR spectrum of compound <b>24</b>                                                        | S5  |
| E. <sup>1</sup> H NMR spectrum of compound <b>46</b>                                                         | S6  |
| F. <sup>13</sup> C NMR spectrum of compound <b>46</b>                                                        | S7  |
| G. <sup>1</sup> H NMR spectrum of compound <b>49</b>                                                         | S8  |
| H. <sup>13</sup> C NMR spectrum of compound <b>49</b>                                                        | S9  |
| I. <sup>1</sup> H NMR spectrum of compound <b>53</b>                                                         | S10 |
| J. <sup>13</sup> C NMR spectrum of compound <b>53</b>                                                        | S11 |
| K. <sup>1</sup> H NMR spectrum of compound <b>54</b>                                                         | S12 |
| L. <sup>13</sup> C NMR spectrum of compound <b>54</b>                                                        | S13 |
| M. K <sub>d</sub> and B <sub>MAX</sub> estimates comparing D2R GloSensor and D2R Tango cell types (Table S1) | S14 |
| N. GloSensor cAMP inhibition with no D2R expressed (Figure S1)                                               | S15 |
| O. D2R G protein antagonism by compound <b>1</b> (Figure S2)                                                 | S16 |

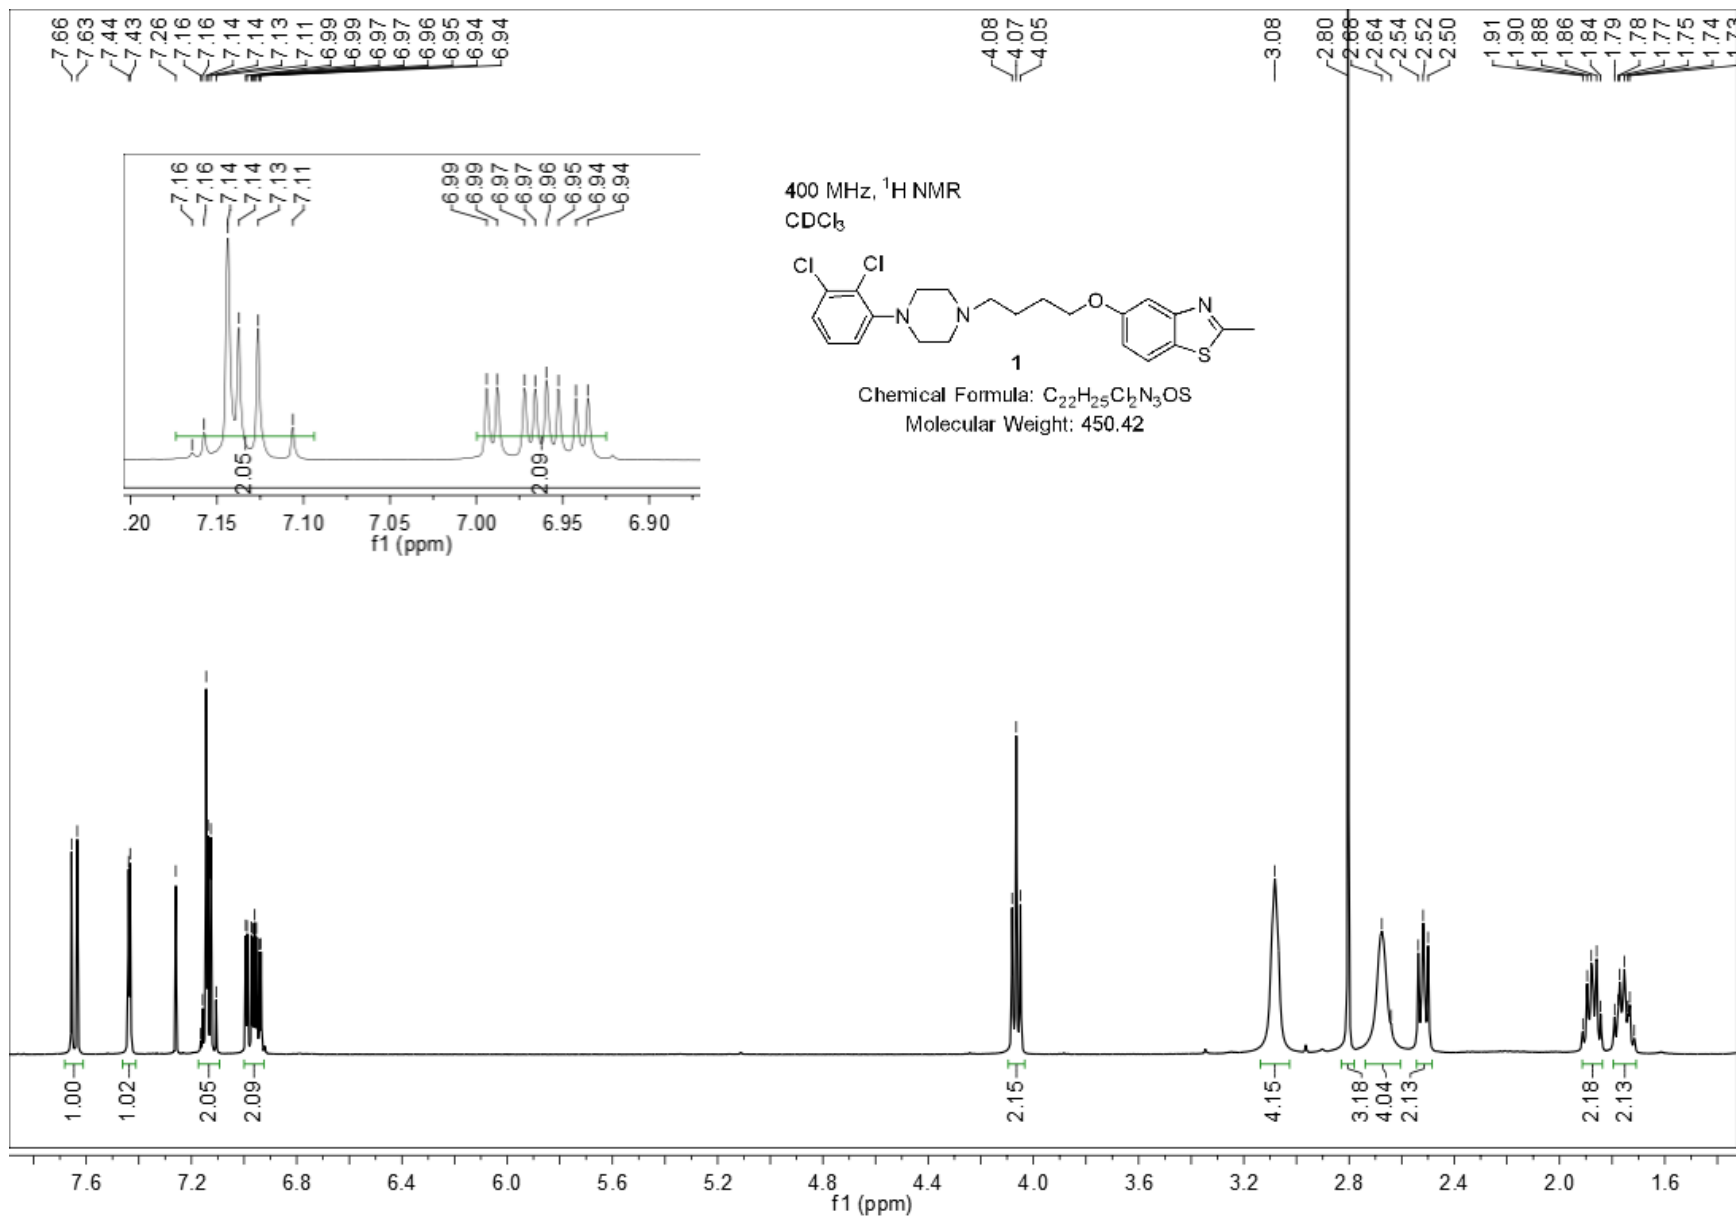

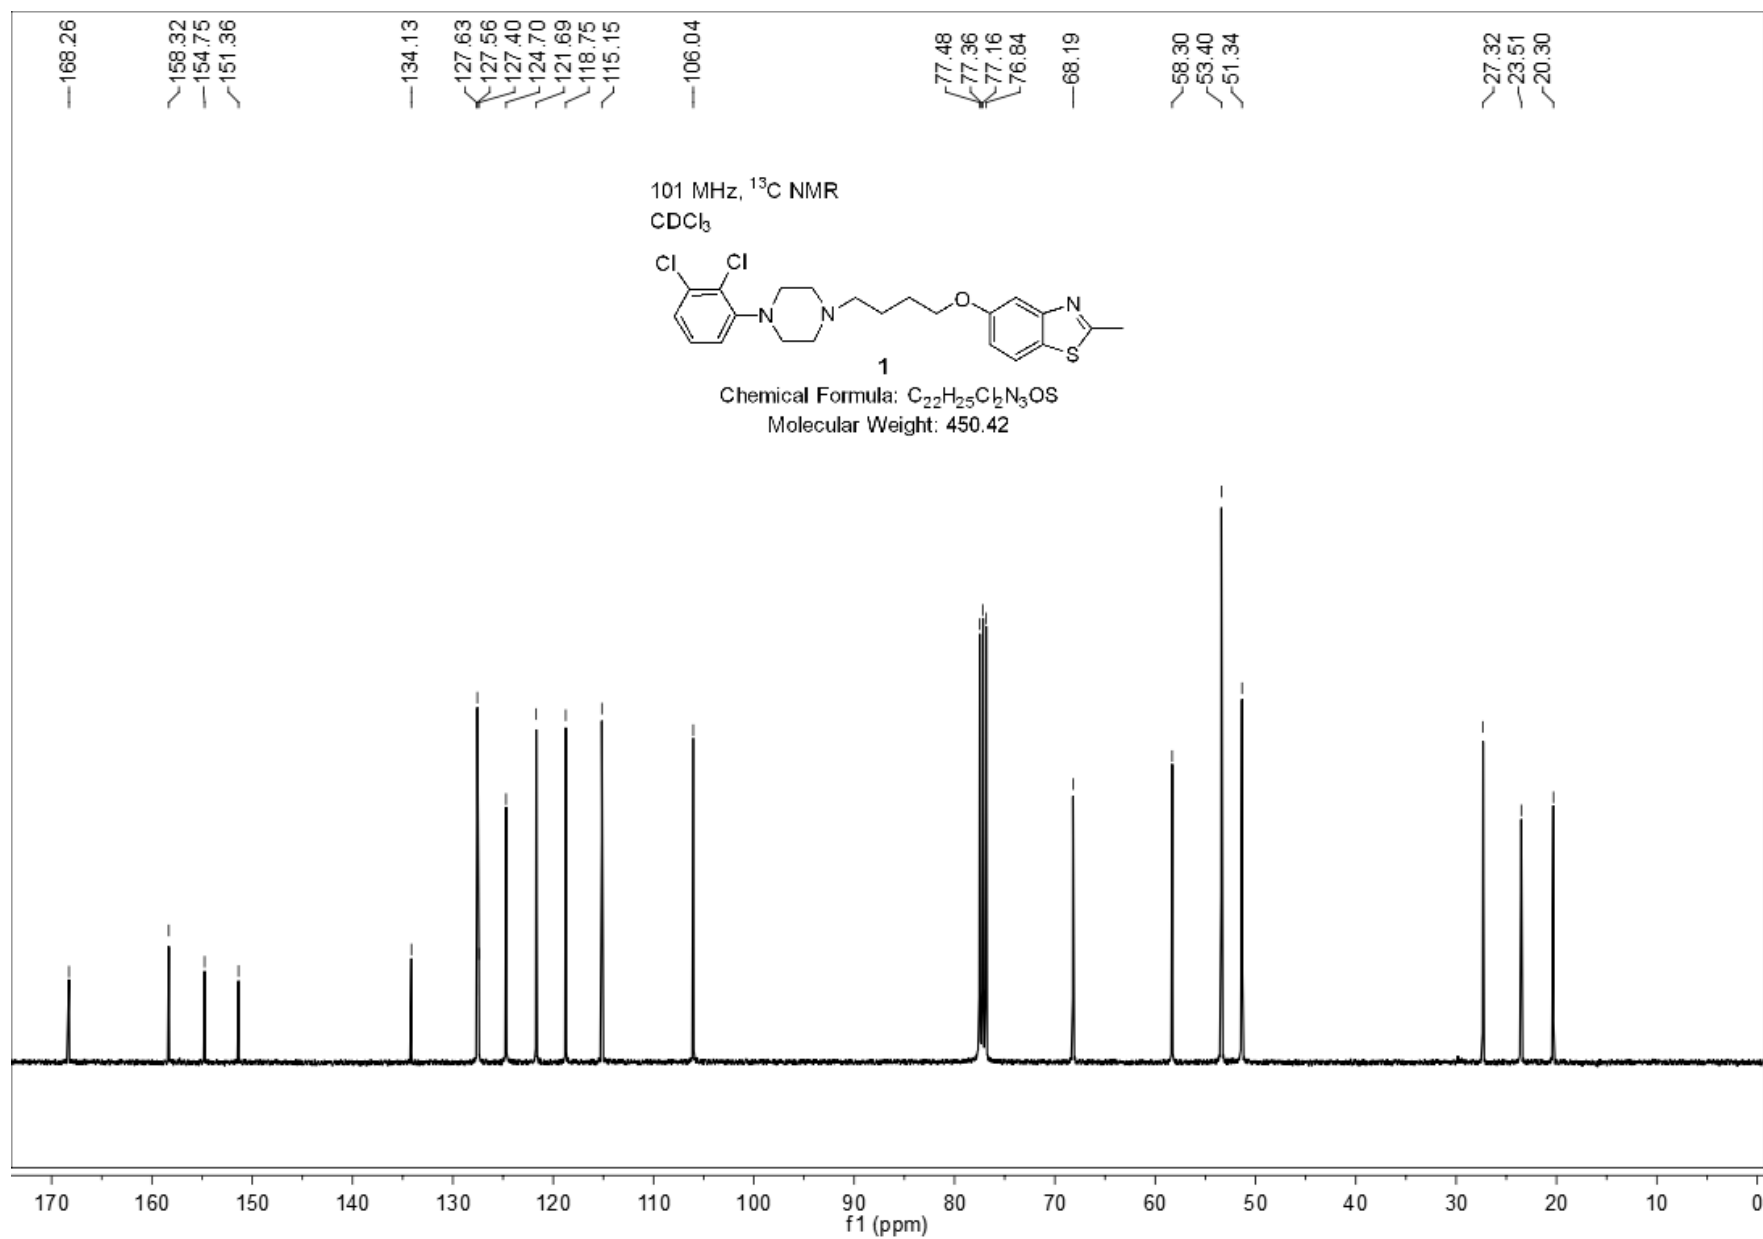

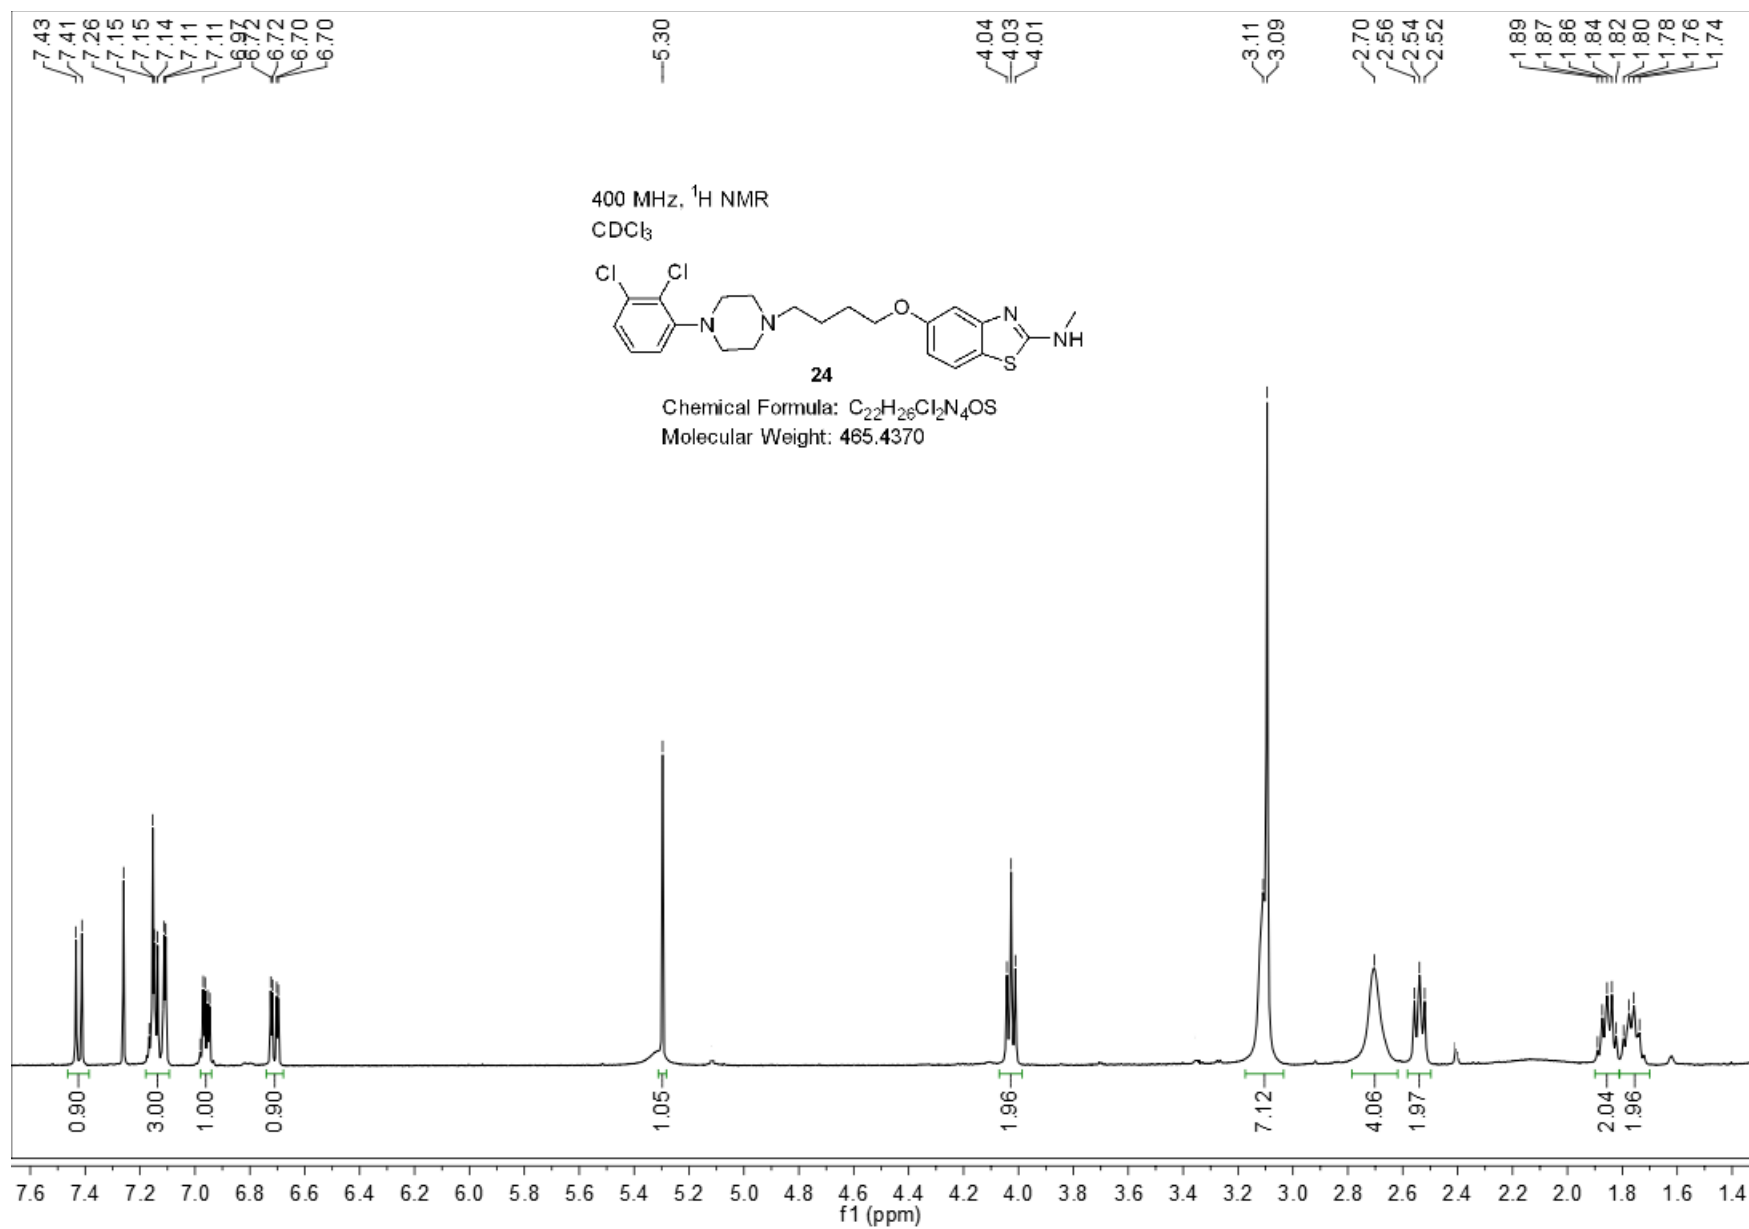

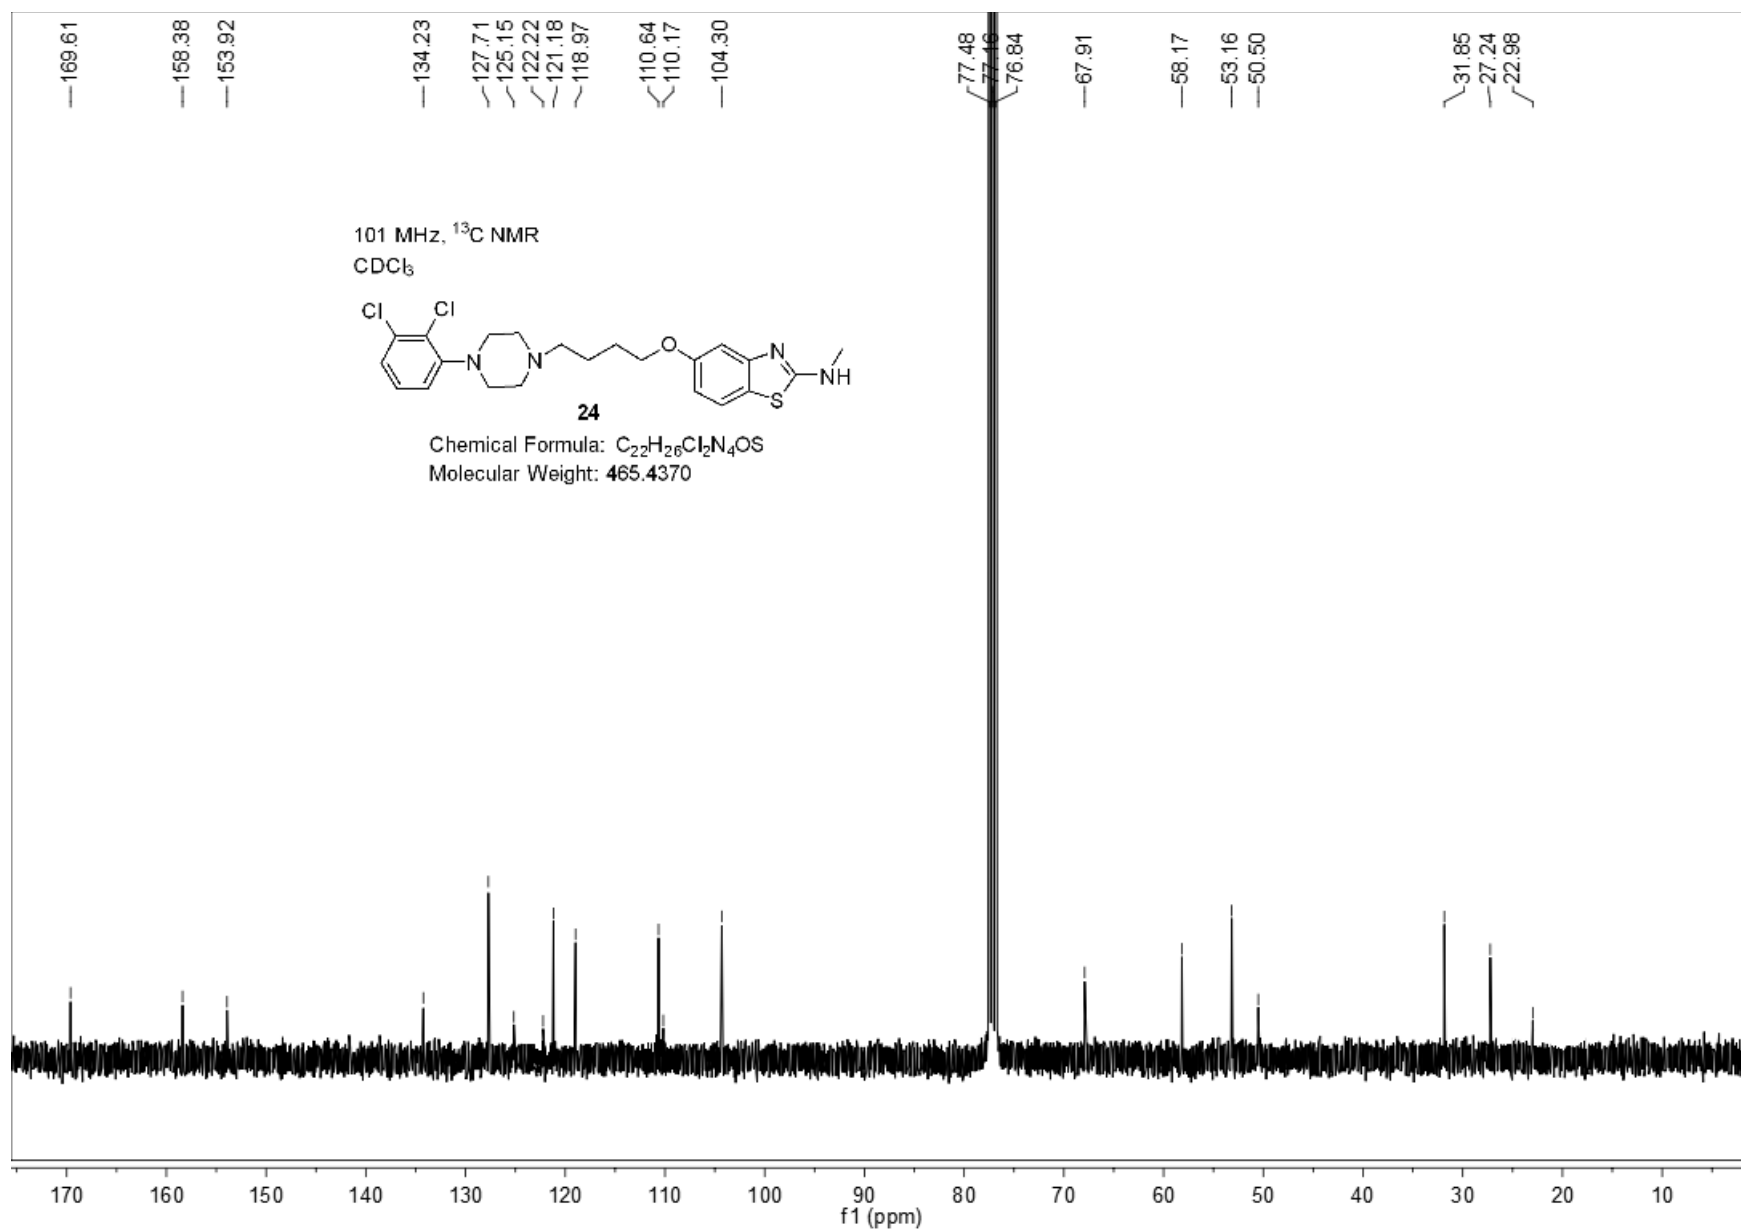

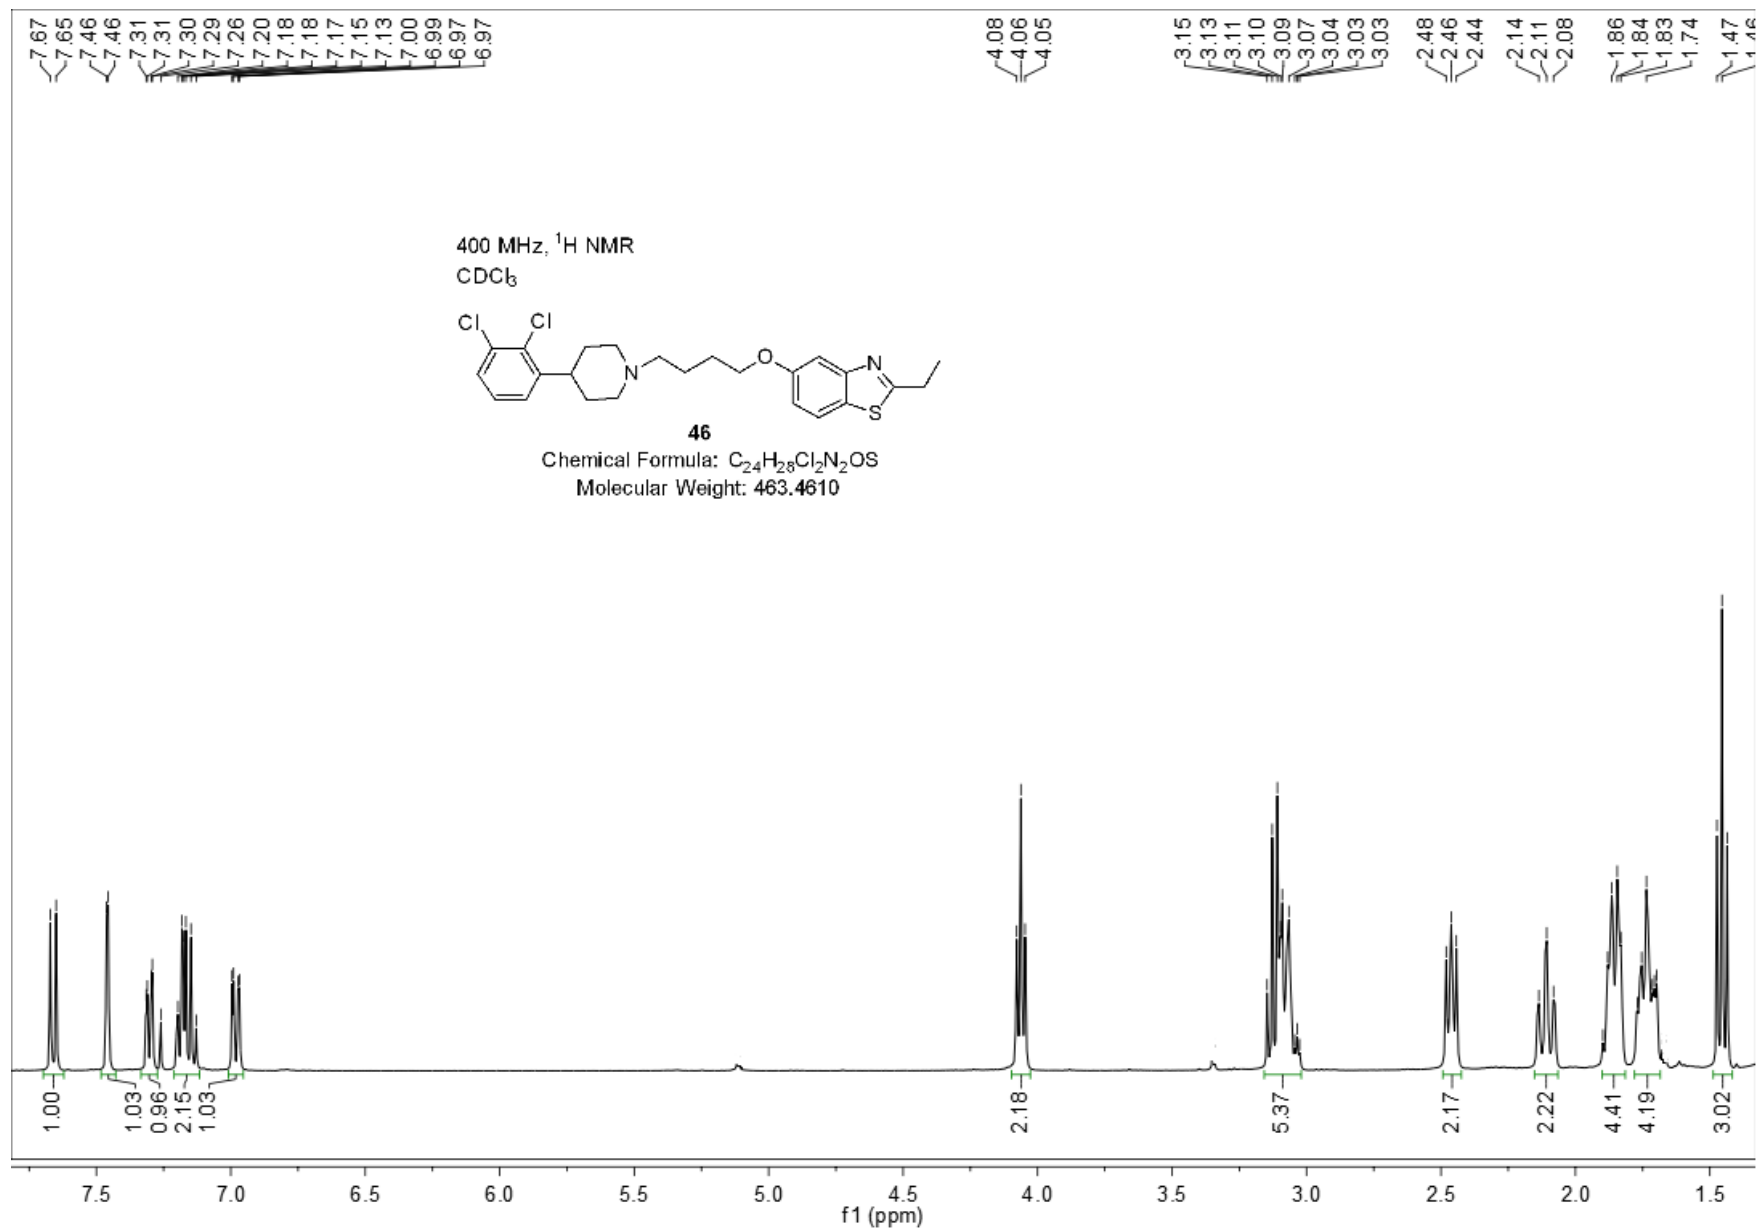

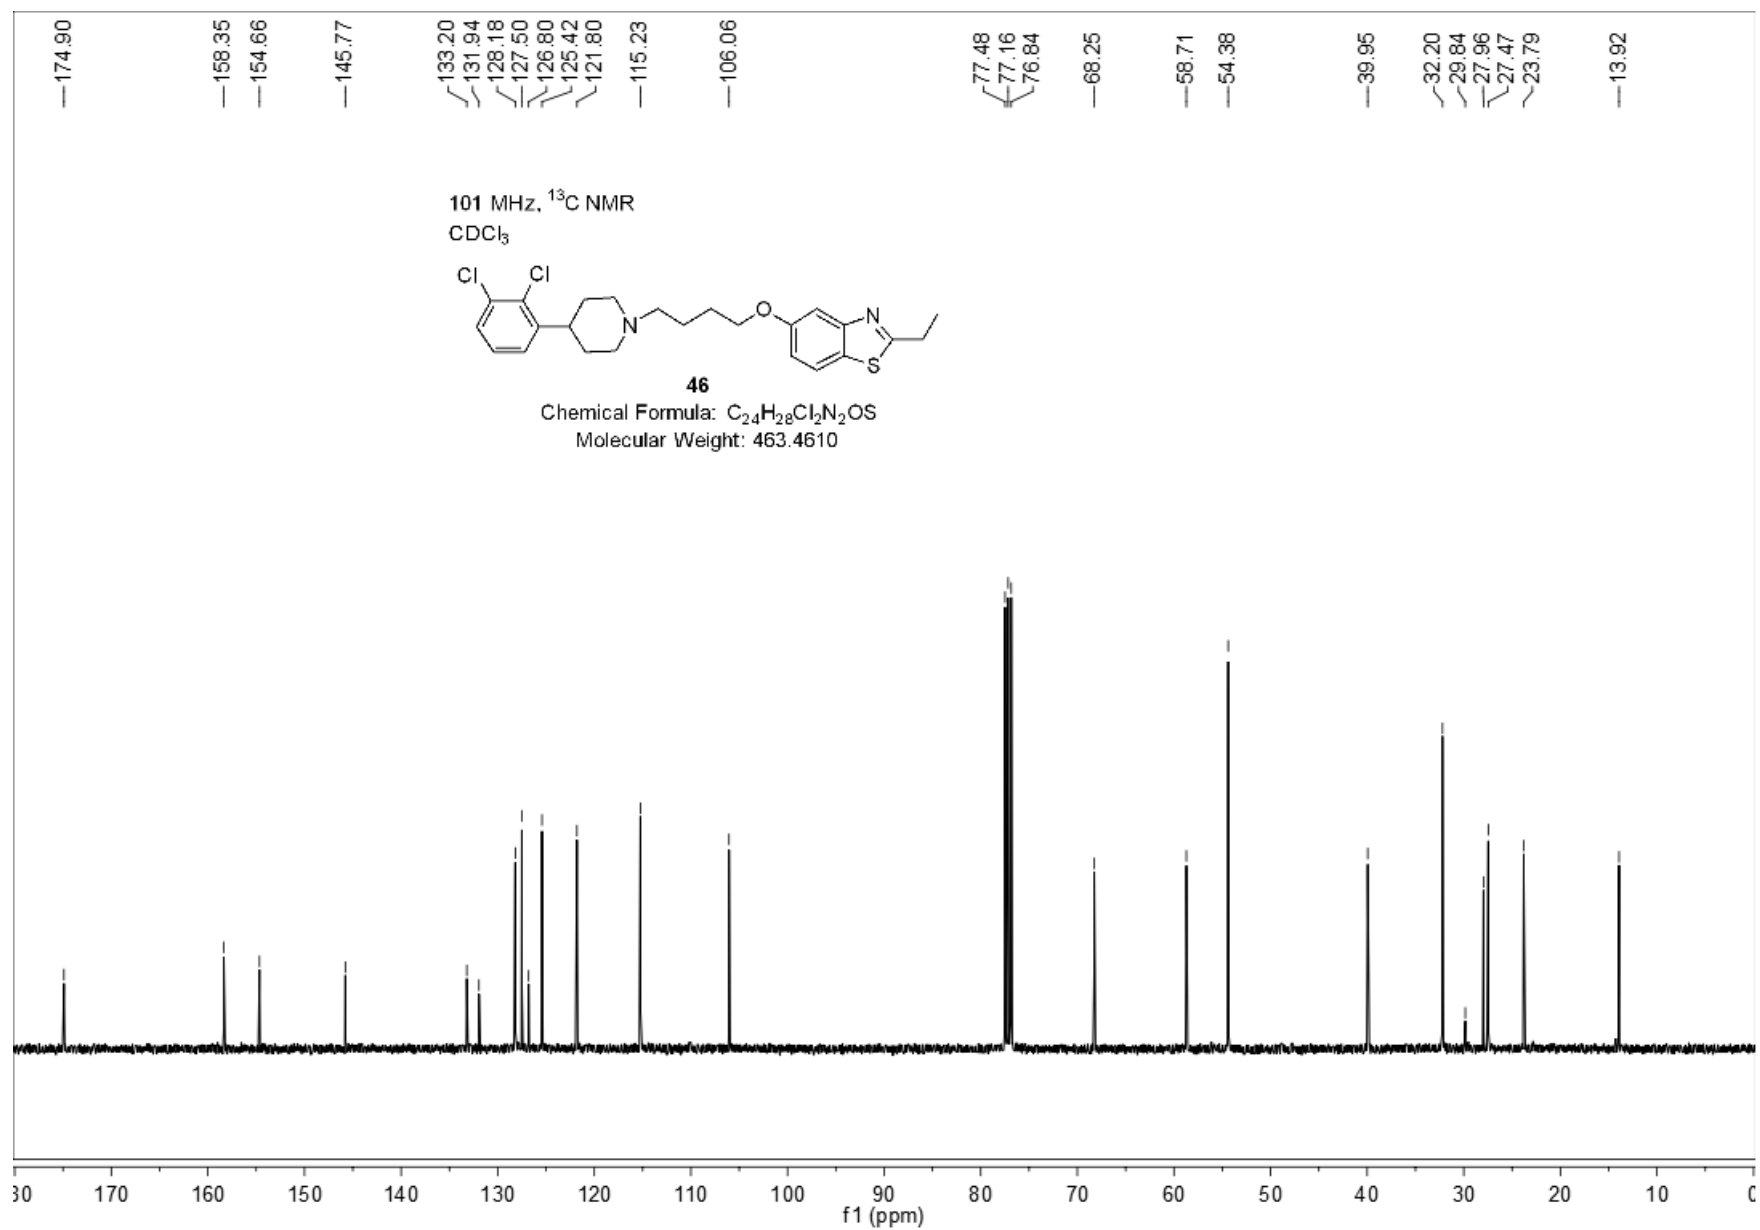

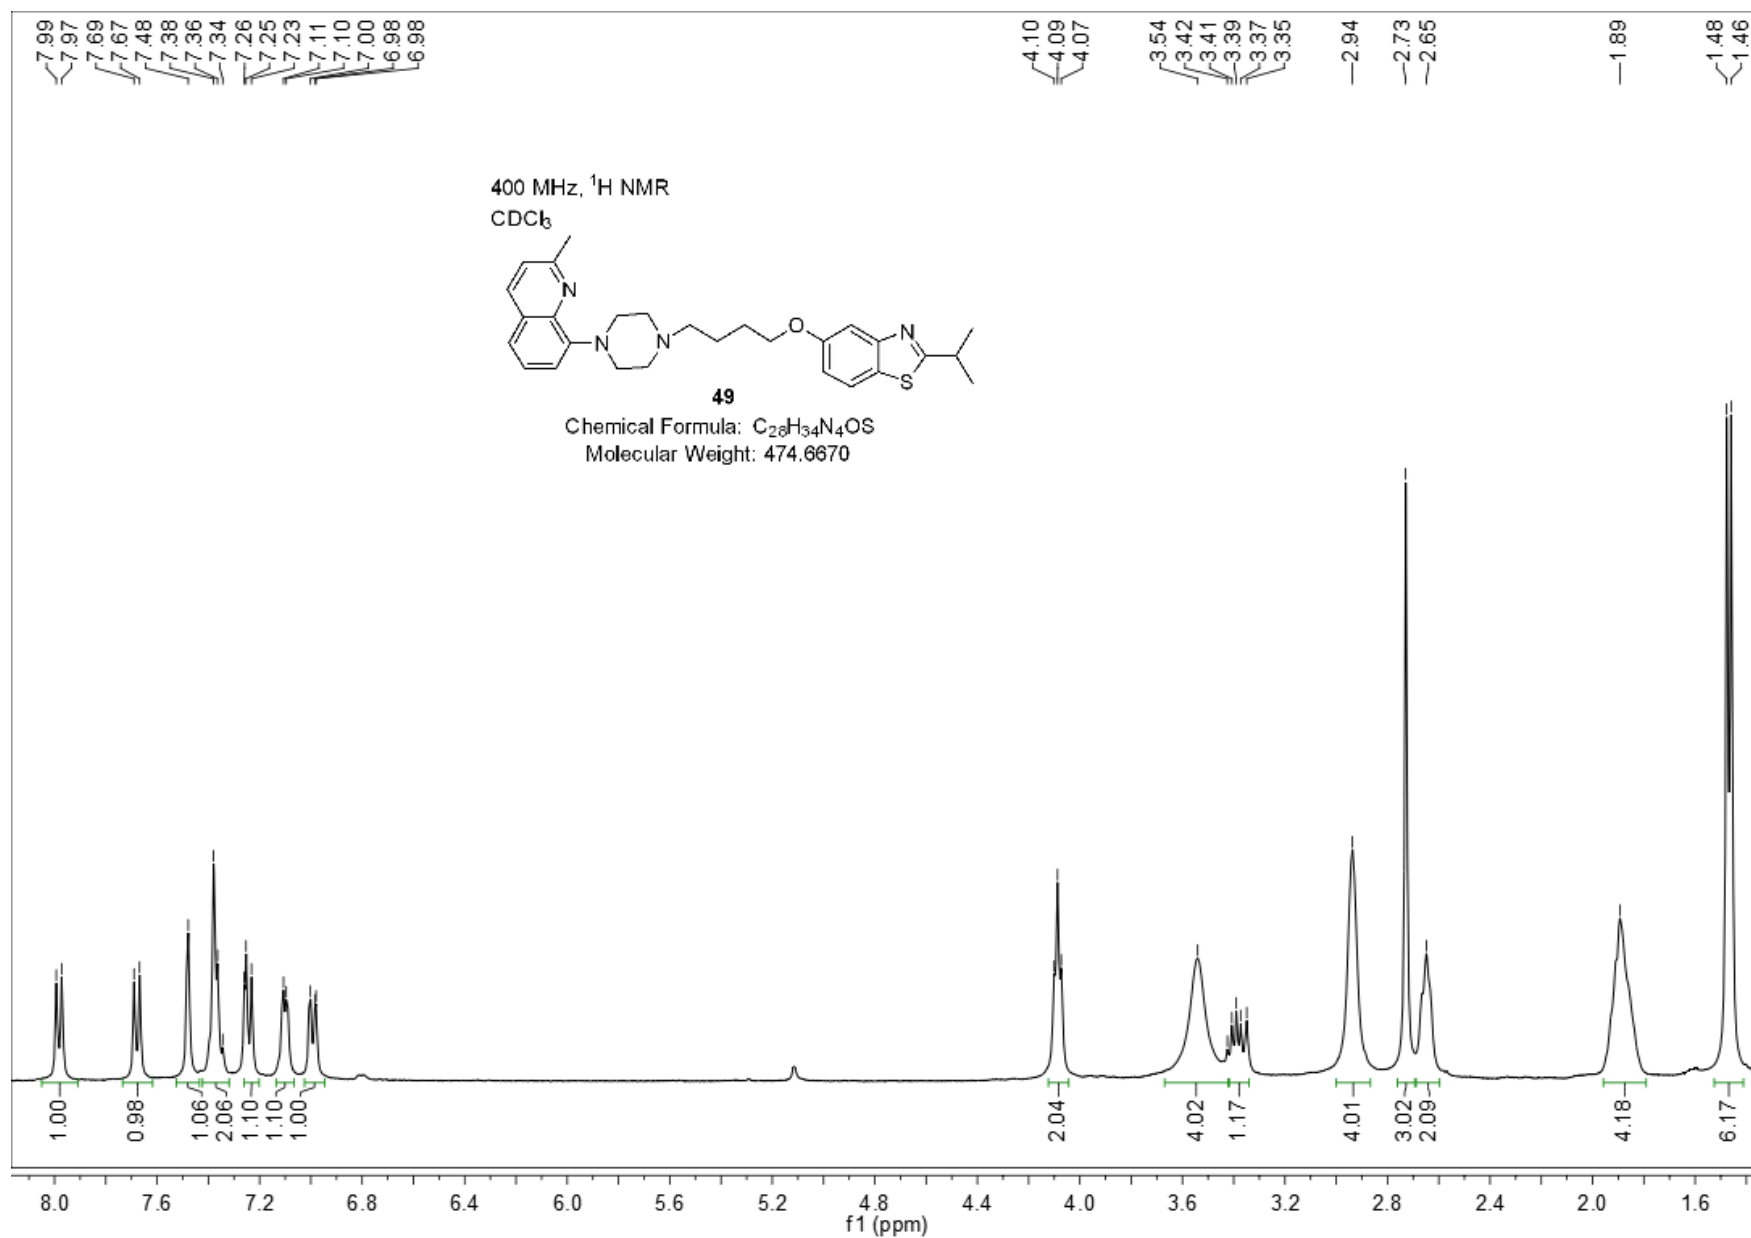



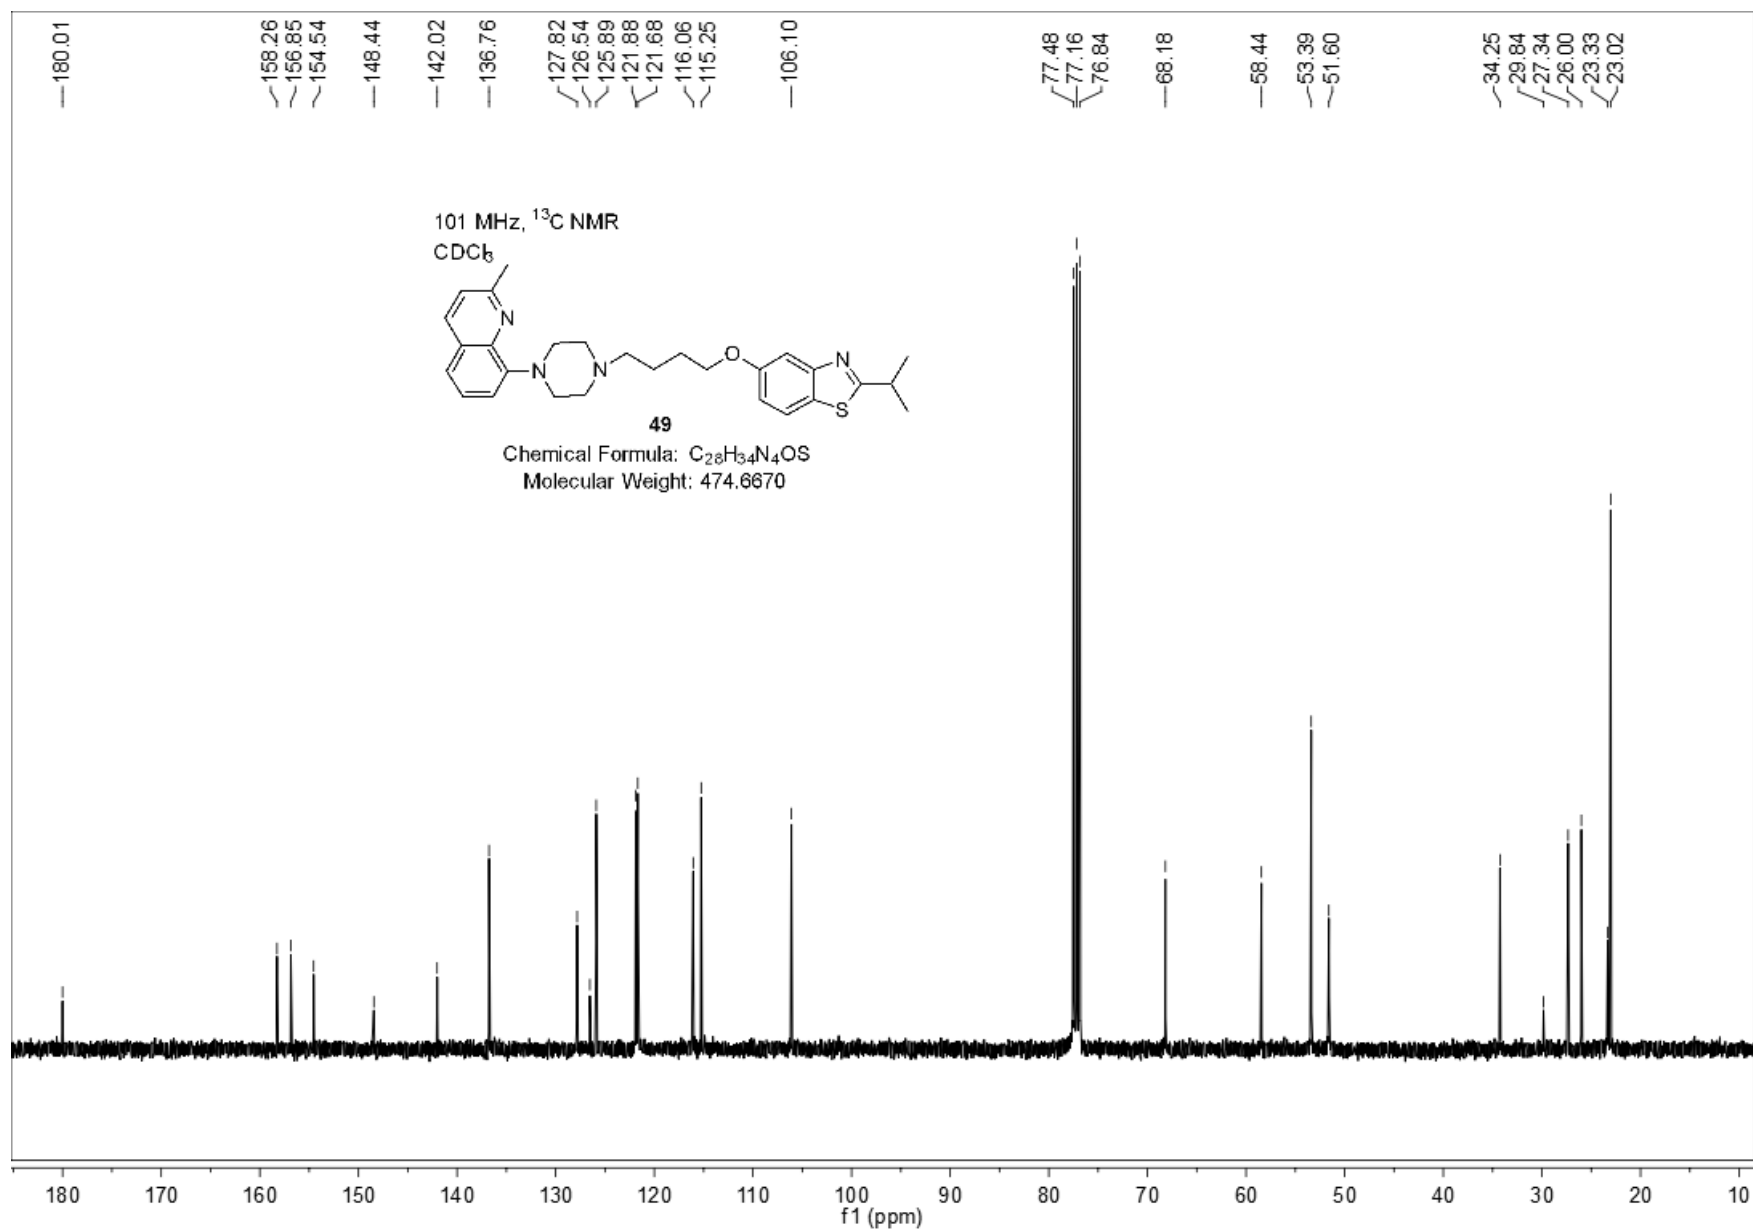

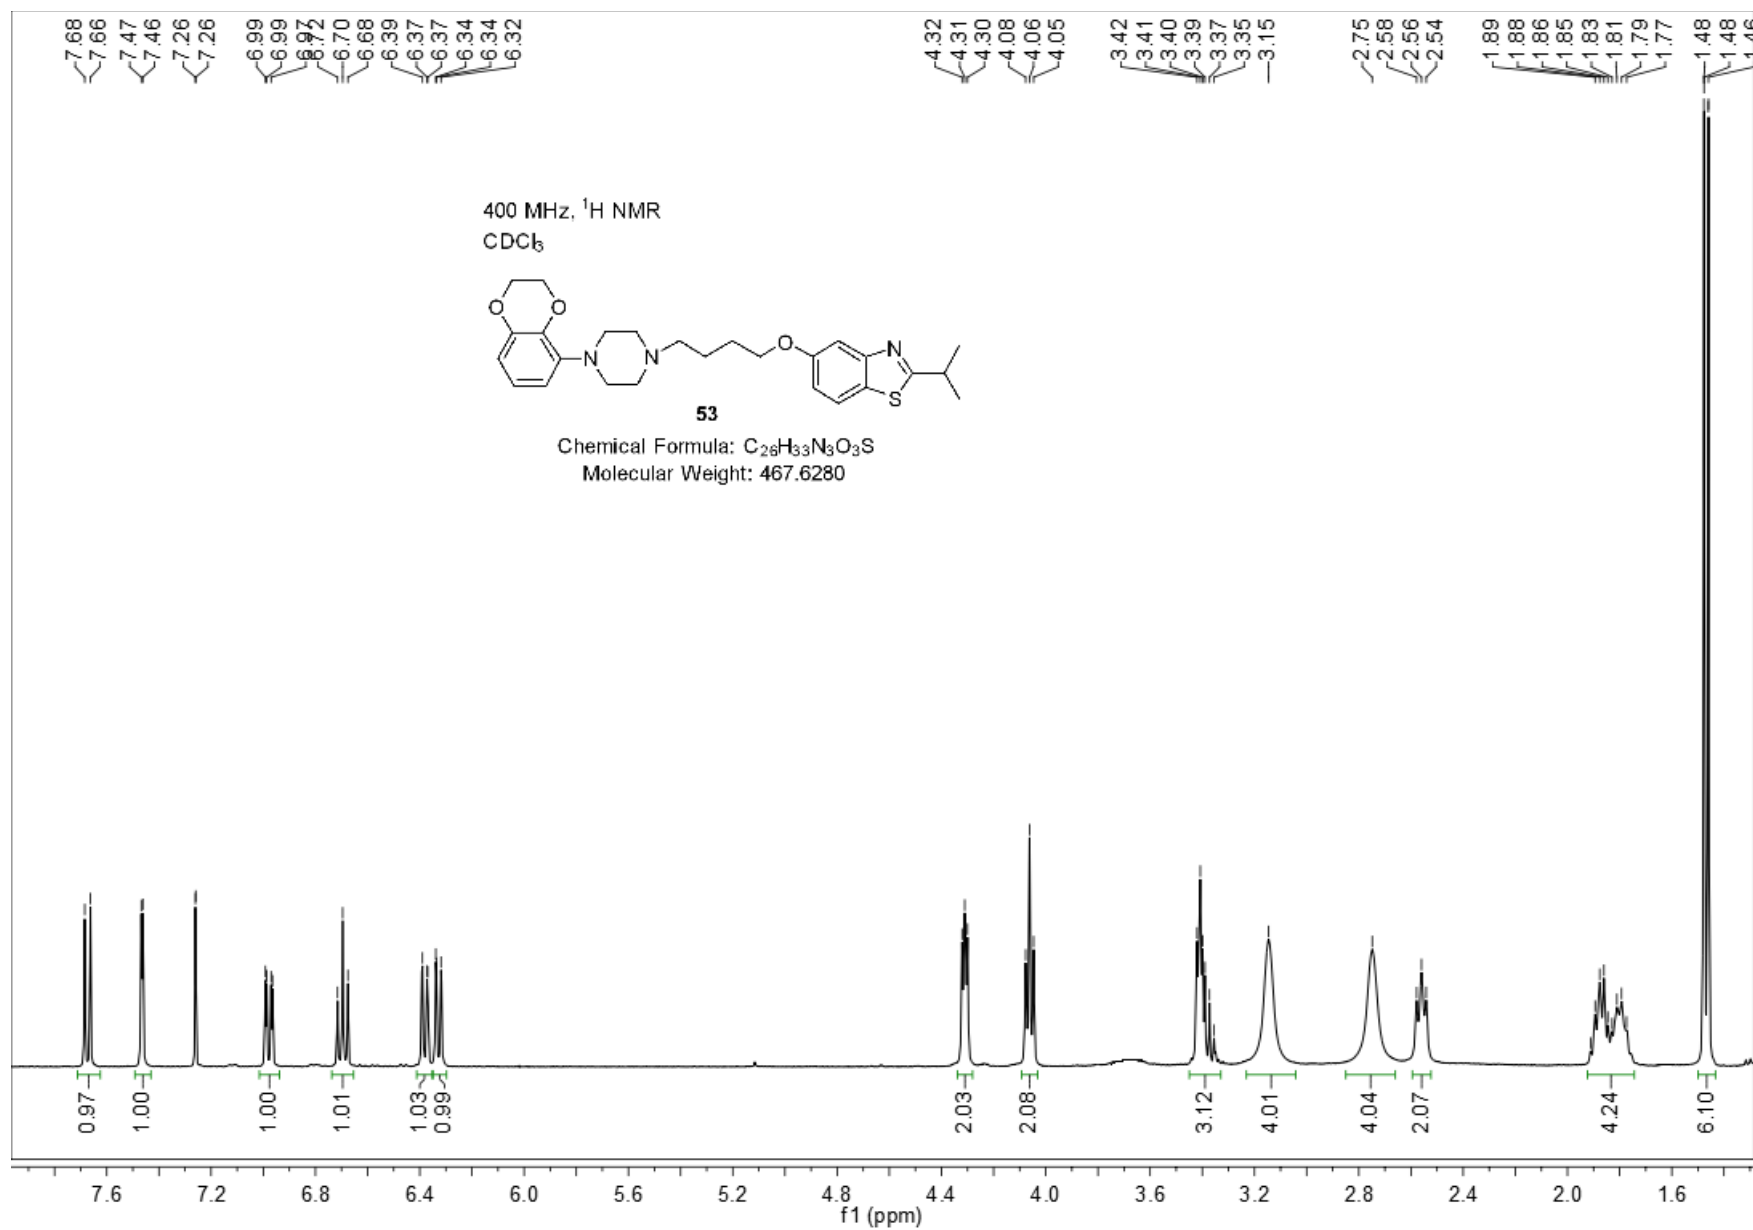

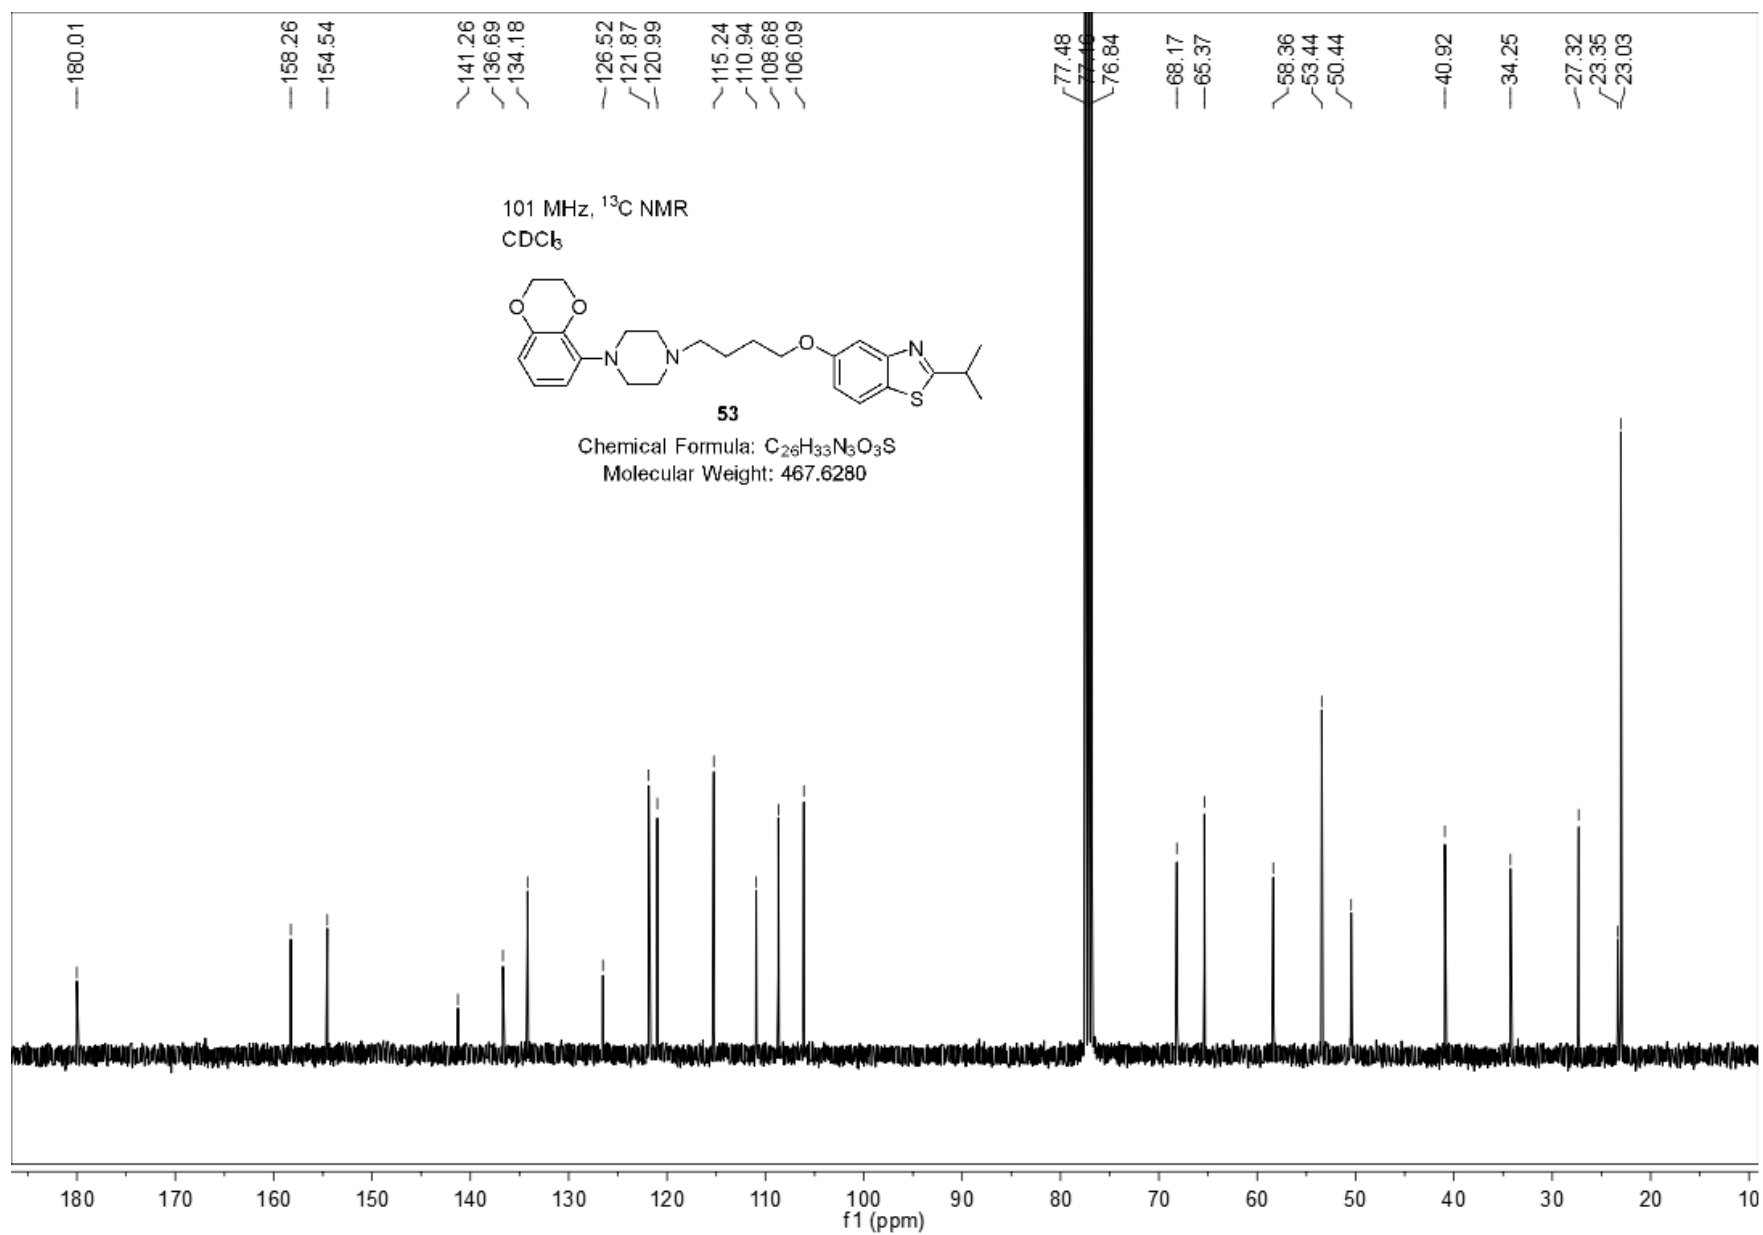

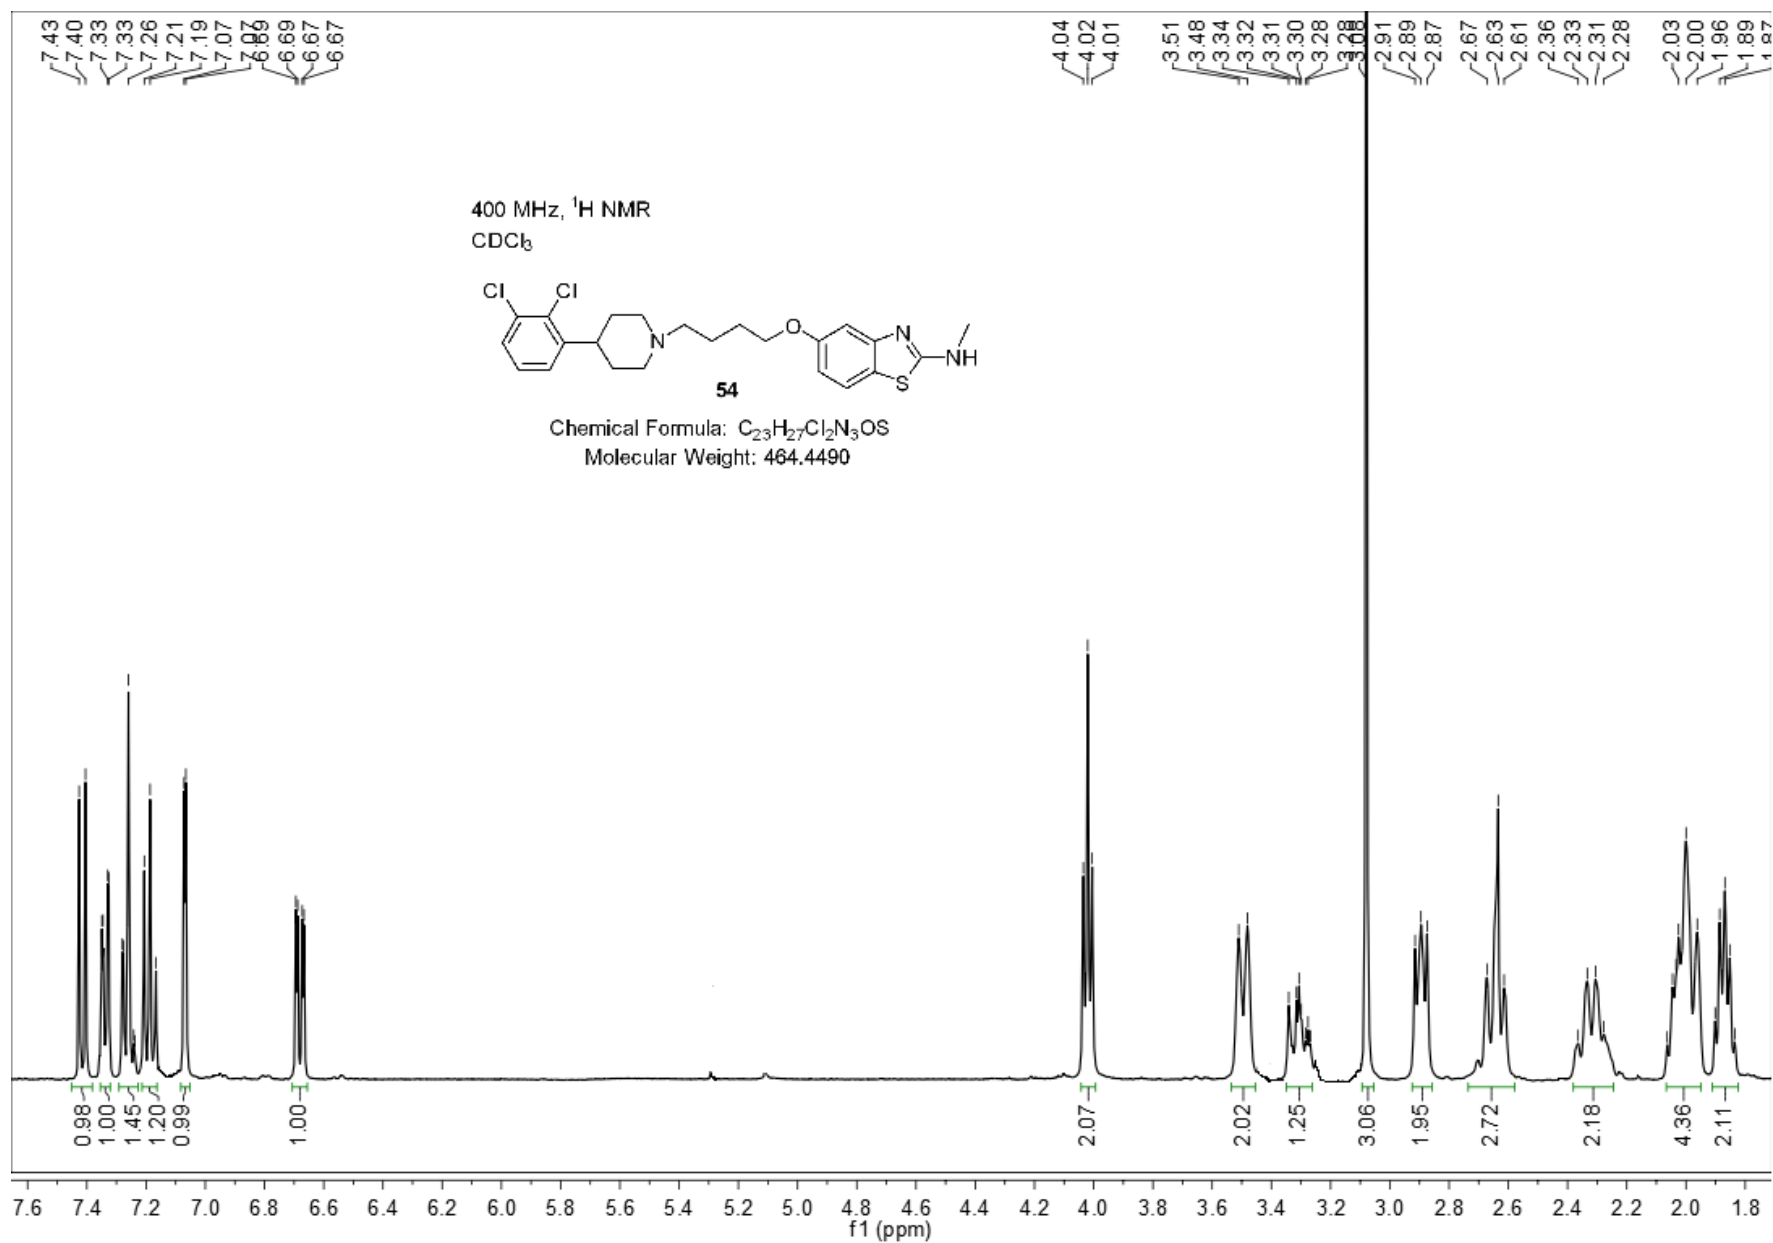

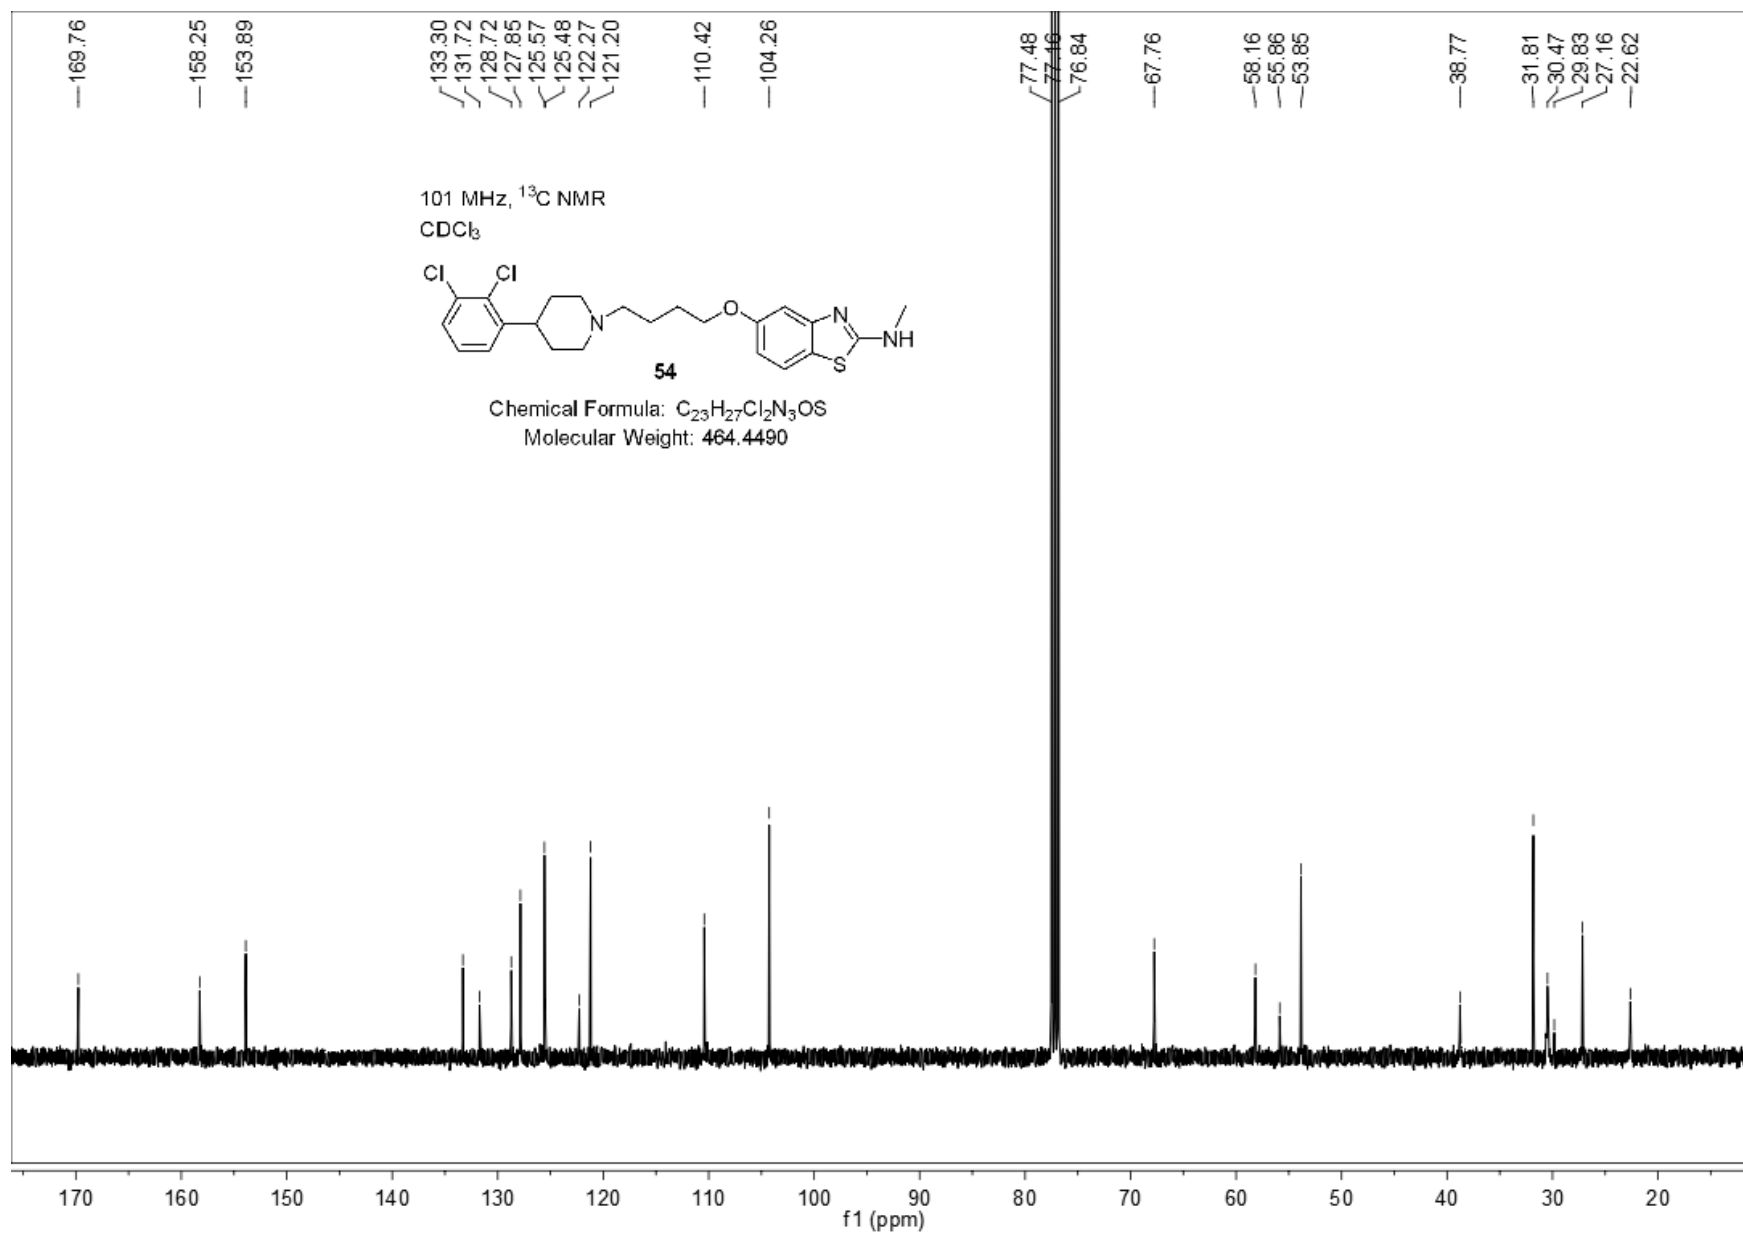

**Table S1.**  $K_d$  and  $B_{MAX}$  estimates comparing D2R GloSensor and D2R Tango cell types<sup>a</sup>

| <b>Cell Type</b>        | <b><math>K_d</math>, nM<br/>(<math>pK_d \pm SEM</math>)</b> | <b><math>B_{MAX}</math><br/>(fmol/mg protein)</b> |
|-------------------------|-------------------------------------------------------------|---------------------------------------------------|
| D2R GloSensor<br>(HEKT) | 0.11 (9.97 $\pm$ 0.08)                                      | 1290 $\pm$ 105                                    |
| D2R Tango<br>(HTLA)     | 0.12 (9.95 $\pm$ 0.12)                                      | 1284 $\pm$ 107                                    |

<sup>a</sup>Estimates of  $K_d$  and  $B_{MAX}$  were obtained by radioligand saturation assays using [<sup>3</sup>H] N-methyl spiperone and 5  $\mu$ M (+)-butaclamol to define non-specific binding. Human D2R<sub>Long</sub> receptors were expressed in either HEKT cells expressing GloSensor or in HTLA cells expressing  $\beta$ -arrestin-2-TEV protease. Data represent average and standard error of the mean (SEM; n=4).

**Figure S1.** GloSensor cAMP inhibition with no D2R expressed.

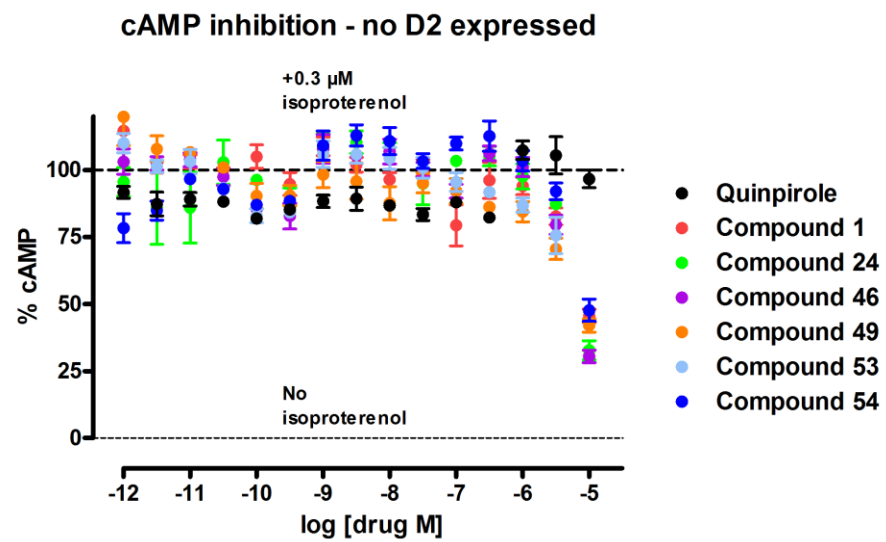

**Figure S2.** D2R G protein antagonism by compound 1.

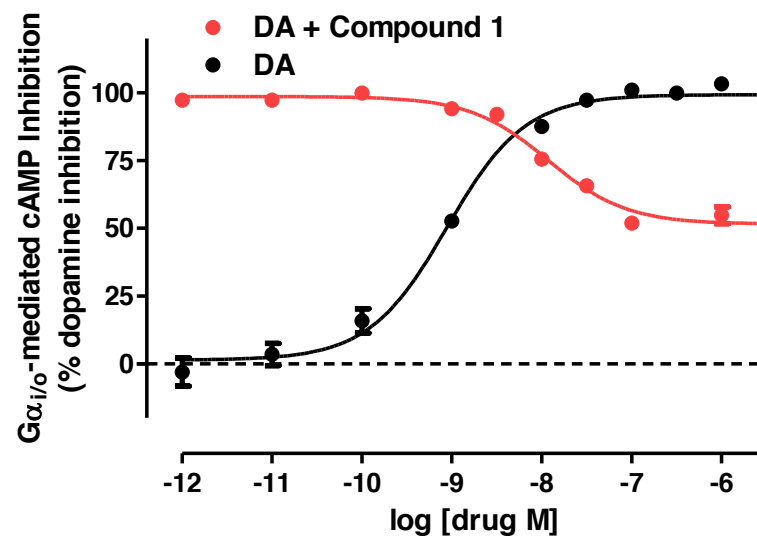

Supplement: NIHMS827411-supplement-Supporting_Information.pdf [file NIHMS827411-supplement-Supporting_Information.pdf]
